# Supplementary material
Source: PubMed Central journal article supplement (PMC2997025)
Supplement: supp_00239.2010_legends.pdf [file supp_00239.2010_legends.pdf]

## 1 **Decoding and cortical source localization for intended movement direction with MEG**

2  
3  
4 W Wang, G P Sudre, Y Xu, R E Kass, J L Collinger, A D Degenhart, A I Bagic, and D J Weber  
5

### 6 **Figure Legends**

7 **Figure 1.** The center-out task with accompanying speed profile during overt wrist movement. The subject controls  
8 the 2-D cursor position using wrist movements. The cursor needs to go to the center and stay there for a hold period  
9 until the peripheral target appears. Then the cursor moves to the target and stays there for another hold period to  
10 complete the trial successfully. The target changes color when hit by the cursor, and disappears when the holding  
11 period has finished. There was a 1-second interval between trials. The bottom trace shows the speed profile of the  
12 cursor from a representative trial, and the dotted lines delimit the pre-movement/planning period within which a  
13 time window was identified and used for decoding the intended movement direction for overt movement trials.  
14

15 **Figure 2.** Effects of signal smoothing (*A*) and MEG signal modulation by movement directions (*B*, *C*) for one MEG  
16 sensor (gradiometer) above the contralateral sensorimotor area. Data were collected from Subject S1. *A*: Raw MEG  
17 trace (the solid gray line) overlaid by its smoothed version (the dashed black line) during a single overt trial. Time 0  
18 represents movement onset. *B*: Each trace represents the average of smoothed signals of all repetitions for each  
19 movement direction for one subject. Data were aligned to movement onset (Time 0, the vertical dashed line). The  
20 vertical solid line indicates average target onset time. The four traces were normalized to the maximum of absolute  
21 amplitude. There is a clear downward deflection of MEG signals about 100 to 200 ms before movement onset. The  
22 amplitude of this downward deflection varies across different movement directions. Furthermore, the gray area  
23 indicates the average time window used for sensor-space decoding analysis (time of interest) across all subjects. *C*:  
24 Same as *B*, except that the data were from imagined movement and aligned to target onset (Time 0, the vertical solid  
25 line). The vertical dashed line indicates average movement onset time. Position of this MEG sensor is shown in the  
26 inset, and the gray area represents the whole-head helmet. F: Front, L: Left, R: Right.  
27

28 **Figure 3.** Modulation of MEG responses examined in 2-D space using the first two components of LDA. The LDA  
29 analysis projects activities of all MEG sensors above the sensorimotor area (sensor positions shown in the inset) into  
30 a low-dimensional space, where modulation of MEG responses by intended movement direction can be easily

31 visualized. The figure shows a 2-D projection of single-trial MEG responses averaged over -200 to 0 ms relative to  
32 movement onset (Subject S1). They clearly form four distinct clusters corresponding to four different intended  
33 movement directions. The green plus signs, black squares, blue circles, and red triangles represent single-trial MEG  
34 responses for movement in the up, down, left, and right directions.

35

36 **Figure 4.** Temporal dynamics of decoding accuracy during center-out movement. Decoding accuracies were  
37 calculated every 10 ms using MEG data within that 10-ms interval. *A*: Overt non-delayed. *B*: Imagined non-  
38 delayed. *C*: Overt delayed. *D*: Imagined delayed. For each plot, the thin gray lines represent decoding accuracies  
39 for individual subjects, and the thick black line represent the decoding accuracy averaged over all subjects. Time 0  
40 corresponds to movement onset for overt movement and target onset for imagined movement. For movement with  
41 delay (*C, D*), average delay periods were marked with double-arrow lines.

42

43 **Figure 5.** Localization of active cortical areas for overt (*A, C*) and imagined (*B, D*) movements. MCE was used to  
44 localize active cortical sources during the time period used for decoding analysis in Subject S1. Data were averaged  
45 over all repetitions for leftward movement. *A, C*: Cortical activity from -200 to 0 ms relative to the onset of overt  
46 movement. *B, D*: Cortical activity from 300 to 420 ms relative to target onset for imagined movement. The  
47 contralateral motor cortical area shows strong activation. In addition, there is a certain degree of visual and  
48 ipsilateral motor cortical activity.

49

50 **Figure 6.** Localization of cortical sources modulated by intended movement direction. Combination of MCE with  
51 bootstrapping created multiple estimates of cortical activity for each movement direction, and a likelihood ratio test  
52 was used to examine whether a cortical source (a triangular surface patch on brain surface plots) was modulated by  
53 intended movement direction. Surface patch color represents the significance of modulation, as measured by the  
54 chi-square statistic calculated within the time period used for decoding analysis in Subject S1. Hotter (red) color  
55 indicates stronger modulation. *A, C*: Left/contra and right/ipsilateral hemisphere activity during overt movement. *B,*  
56 *D*: Left/contra and right/ipsilateral hemisphere activity during imagined movement. *p-values* of  $10^{-3}$  and  $10^{-5}$   
57 correspond to chi-square statistics of 16.2 and 25.9, respectively. The contralateral motor cortical area is  
58 significantly modulated by intended movement direction. In addition, the visual cortical areas and the left inferior

59 frontal gyrus also show modulation.

60

61 **Figure 7.** Temporal dynamics of cortical activity modulation by movement direction. The source-space MANOVA  
62 test was performed in 10-ms intervals to characterize movement modulation of cortical activity, and the resulting F-  
63 statistics were plotted as a function of time for overt (*A*) and imagined (*B*) movements. A *p-value* of  $10^{-5}$   
64 approximately corresponds to an F-statistic of 25.3. Thin gray lines represent the F-statistics for individual subjects  
65 (non-delay task), and the thick black lines represent the average over all subjects. Cortical activity becomes highly  
66 modulated right before movement onset for overt movement and 300 to 400 ms after target onset for imagined  
67 movement.

68

69 **Supplemental Figure 1.** EMG activity for both overt and imagined movements. EMG activity shown in this figure  
70 is the total muscle activity summed over wrist flexor and extensor muscles (flexor carpi radialis and extensor carpi  
71 radialis). *A & B*: These two plots show EMG activity and cursor movement for overt and imagined movement,  
72 respectively (Subject S4, rightward movement, Time 0 is target onset). EMG signals are rectified and averaged over  
73 all trials (blue curves), and the baseline EMG activity during rest is removed. Cursor movement (displacement from  
74 the center target) is also averaged over all trials (red curves). EMG and cursor movement for overt and imagined  
75 movement are normalized to their respective maximum value during overt movement. Onsets of EMG activity and  
76 cursor movement are marked with black arrows in *A*. *C*: EMG activity within the time window used for decoding  
77 movement direction (computed over all repetitions for each subject). Percentage changes from baseline were  
78 calculated for EMG activity and averaged for all trials. Error bars represent standard deviation. For overt  
79 movement, an increase in EMG activity will precede actual cursor movement, as governed by dynamics of limb  
80 movement. Temporally, EMG activity significantly overlaps with cortical activity representing intended movement  
81 as shown by previous animal studies (Moran and Schwartz 1999). Because we used time windows immediately  
82 before overt movement onset to decode intended movement direction, it is inevitable that there is an increase in  
83 EMG activity within those time windows as shown in *A* and *C*. Nevertheless, our data showed that there is no  
84 increase in EMG activity during imagined movement (*B* and *C*), which suggests that paralyzed patients could  
85 generate cortical activity encoding intended movement direction for brain-machine interface applications.

86

87 **Supplemental Figure 2.** Temporal dynamics of MEG sensor activity modulation by movement direction. The  
88 sensor-space MANOVA test was performed in 10-ms intervals to characterize movement modulation of magnetic  
89 activity, and the resulting F-statistics were plotted as a function of time for overt non-delayed (A), imagined non-  
90 delayed (B), overt delayed (C), and imagined delayed (D). For each plot, the thin gray lines represent the F-statistics  
91 for individual subjects, and the thick black lines represent F-statistics averaged over all subjects. Time 0  
92 corresponds to movement onset for overt movement and target onset for imagined movement. Note that the  
93 MANOVA curves were used to find the optimal decoding window for the paper, so it is natural that the shape of the  
94 traces above are similar to the decoding accuracies shown in Figure 4.

95  
96 **Supplemental Figure 3.** Comparison between cortical areas that are active and cortical areas that are tuned to  
97 intended movement direction. *A & B:* This is duplicated from Figure 5, which shows cortical areas that are active  
98 during overt and imagined movement, respectively. Color represents cortical source current amplitude, and the unit  
99 of the color bar is nAm. Hot color (yellow) indicates active areas. *C & D:* This is duplicated from Figure 6, which  
100 shows cortical areas that are tuned to movement directions during overt and imagined movement, respectively.  
101 Color represents F-statistic values. Hot color (yellow) indicates that activity of certain cortical area is significantly  
102 modulated by intended movement direction.

103  
104 **Supplemental Figure 4.** Number of principal components that explain 99% of the variability in the sources. For  
105 each plot, the thin gray lines represent the number of components for individual subjects (non-delayed task), and the  
106 thick black lines represent the average over all subjects. Time 0 corresponds to movement onset for overt movement  
107 (A) and target onset for imagined movement (B). Note that the number of components needed to account for 99% of  
108 the variability in the sources reaches its minimum at the time of the movement for the overt task, and approximately  
109 at the time when the cursor starts moving in the imagined task.

110

## 111 **Table Legends**

112 **Table 1.** Summary of single-trial decoding accuracies (%) across all 9 subjects for overt and imagined movements.  
113 Subjects S1-S5 performed the non-delayed center-out task, and Subjects S6-S9 performed the delayed center-out  
114 task. MEG sensors above the sensorimotor area were used. The time window for decoding analysis was determined  
115 based on the sensor-space MANOVA analysis. MEG signals within that time window were averaged. Intended  
116 movement direction was decoded using a Bayesian classifier with leave-one-out cross validation. The chance level

117 is 25%. The average decoding accuracies across all subjects are 67% and 62.5% for overt and imagined movement,  
118 respectively.  
119

120 **Supplemental Table 1.** Decoding accuracy (%) relative to movement onset. Decoding results for target direction in  
121 the overt task for subjects without delay. The decoding window was chosen such that it always preceded movement  
122 onset by different time periods, which have been shown to be acceptable values for the delay between cortical  
123 activity and the start of movement (Moran and Schwartz, 1999). The length of the decoding window was 100ms for  
124 every subject based on the peak of the MANOVA curve (see Methods section). Chance accuracy is 25%.  
125 Accuracies are still above chance level even when decoding with data 250ms before movement onset. By doing that,  
126 the period containing EMG activity is not used for decoding, but it also ignores any motor cortical activity that  
127 occurs concurrently to that EMG activity, which decreases the results compared to what was shown in the paper.  
128 For ease of comparison, the third row shows decoding accuracies using decoding windows right before movement  
129 onset (copied from Table 1 overt movement condition in the main text).

130

131

132
