# Supplementary material
Source: PubMed Central journal article supplement (PMC2997025)
Supplement: supp_00239.2010_tableS1.pdf [file supp_00239.2010_tableS1.pdf]

| End of decoding window       | S1   | S2   | S3   | S4   | S5   | Mean |
|------------------------------|------|------|------|------|------|------|
| 250 ms before movement onset | 70.1 | 54.2 | 60.3 | 57.1 | 33.9 | 55.1 |
| 150 ms before movement onset | 81.2 | 65.5 | 70.2 | 65.7 | 48.0 | 66.1 |
| 0 ms before movement onset   | 88.6 | 69.0 | 72.4 | 77.8 | 57.9 | 73.1 |
