# Supplementary material
Source: PubMed Central journal article supplement (PMC2997025)

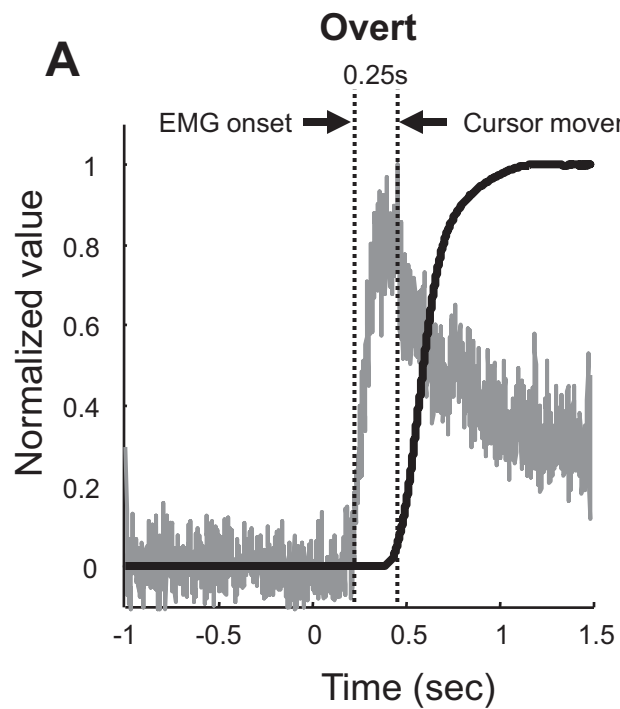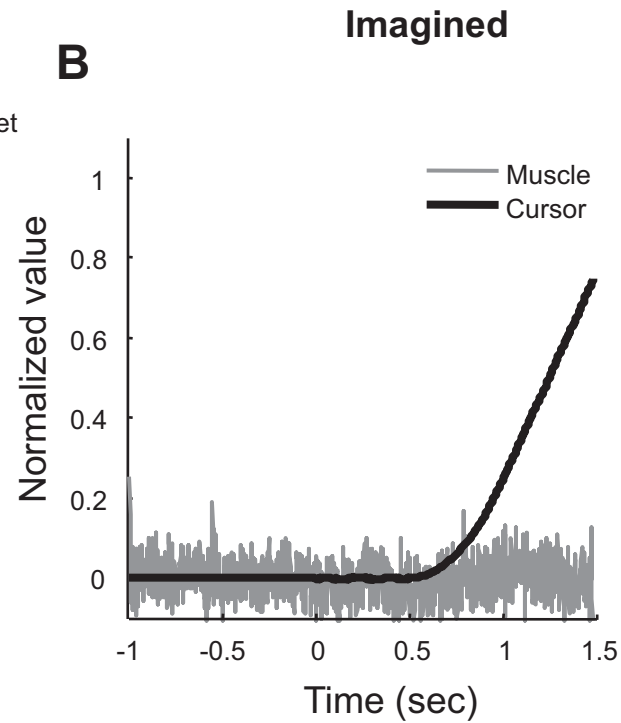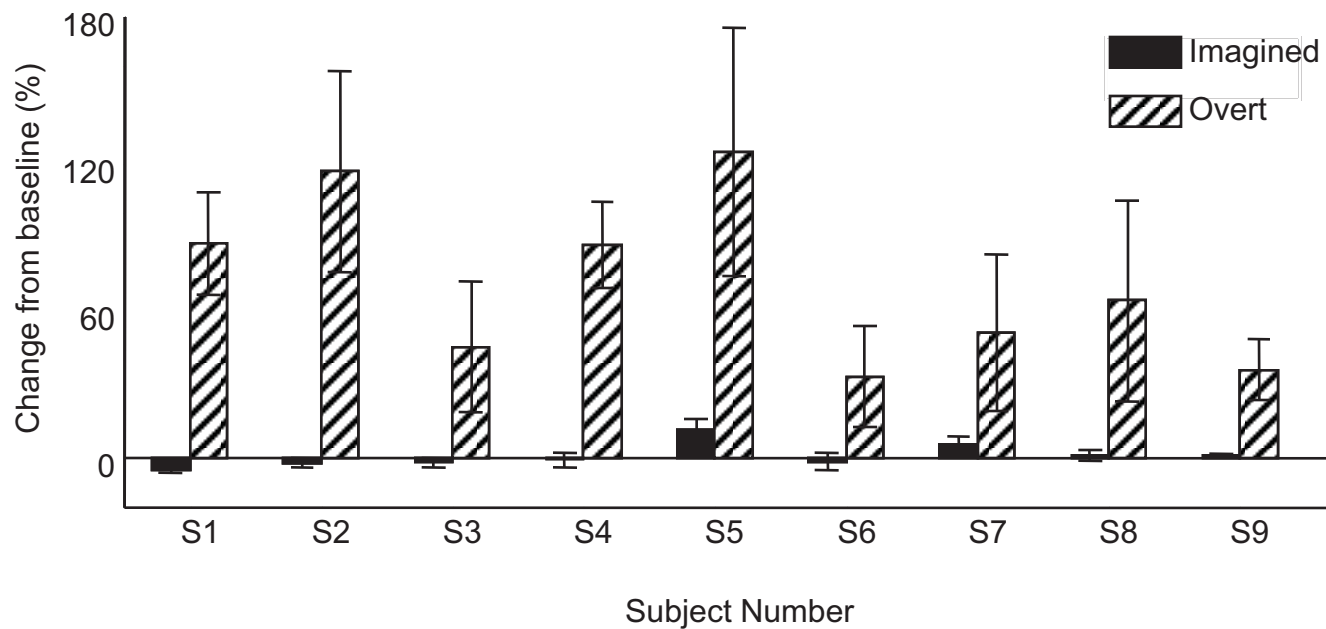

Supplement: supp_00239.2010_figS1.pdf [file supp_00239.2010_figS1.pdf]

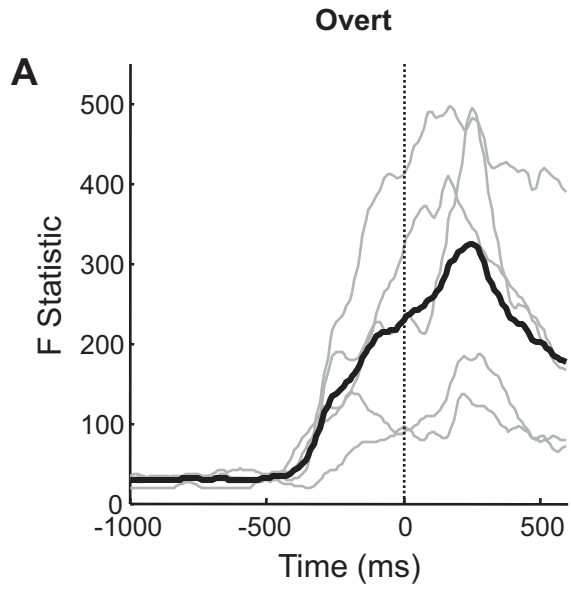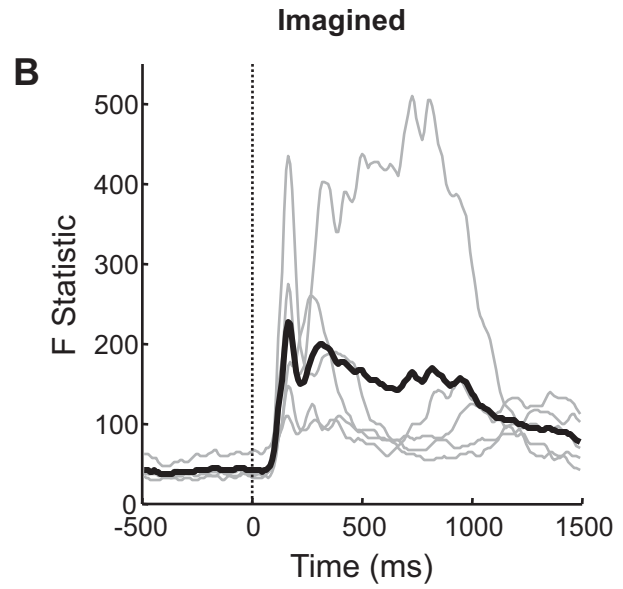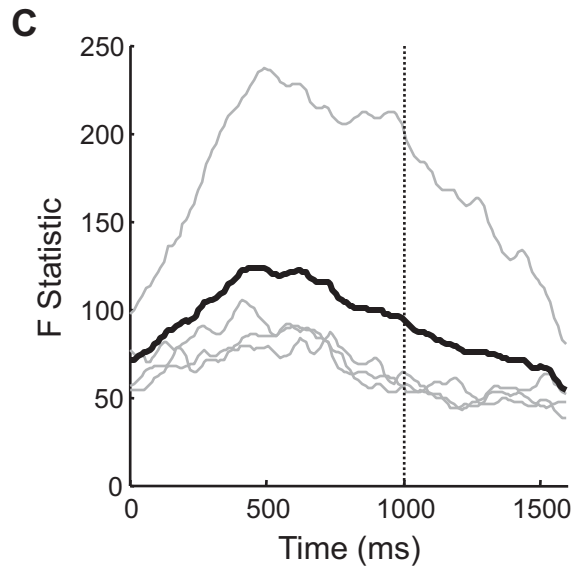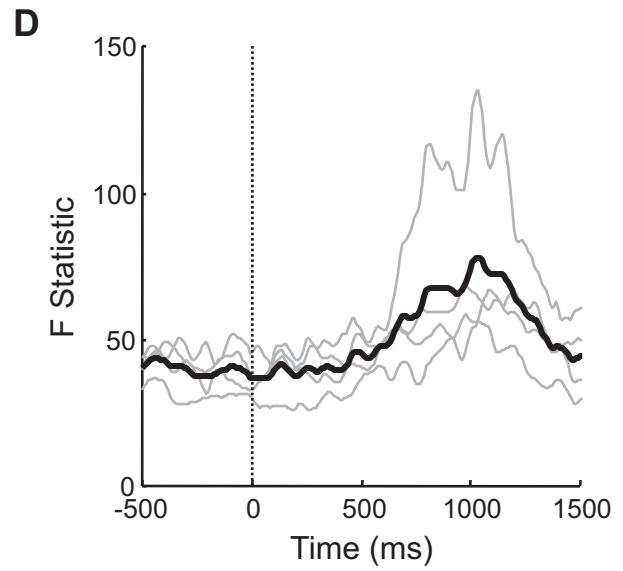

Supplement: supp_00239.2010_figS2.pdf [file supp_00239.2010_figS2.pdf]

# Overt

**A**

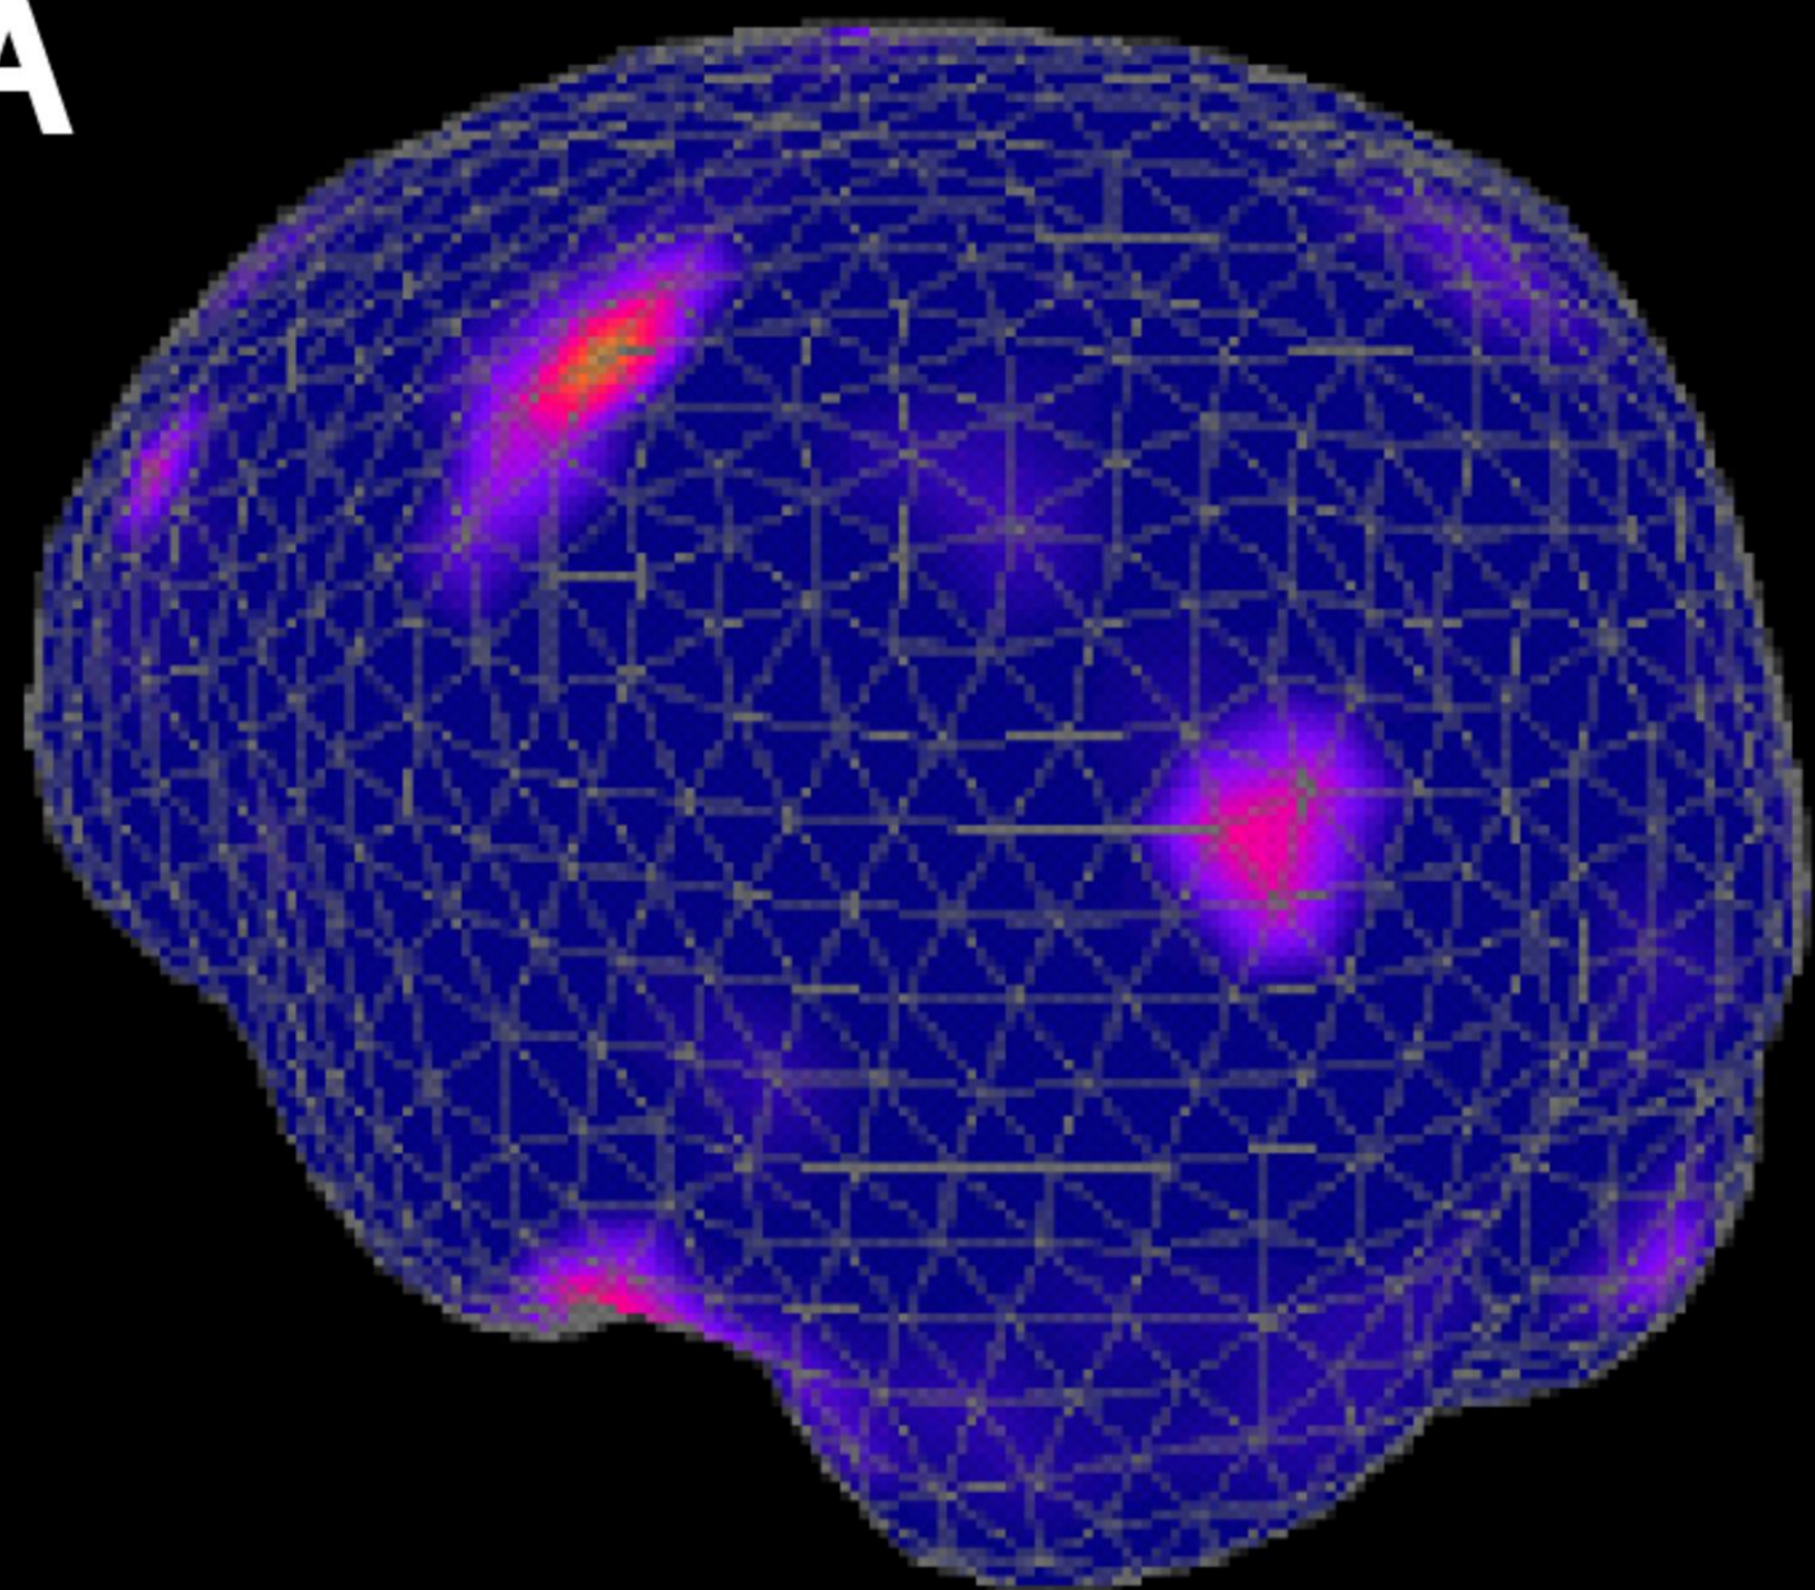

**3**

**2**

**1**

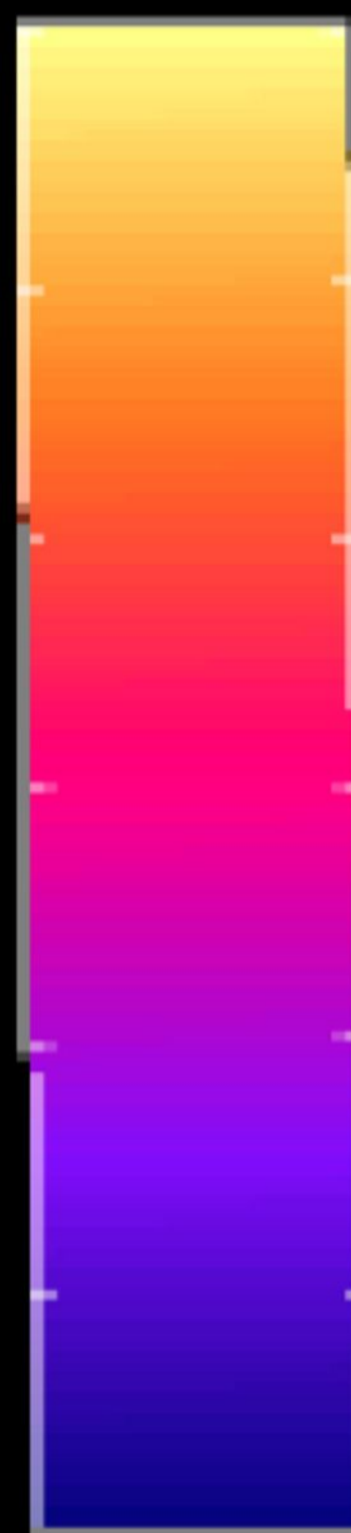

# Imagined

**B**

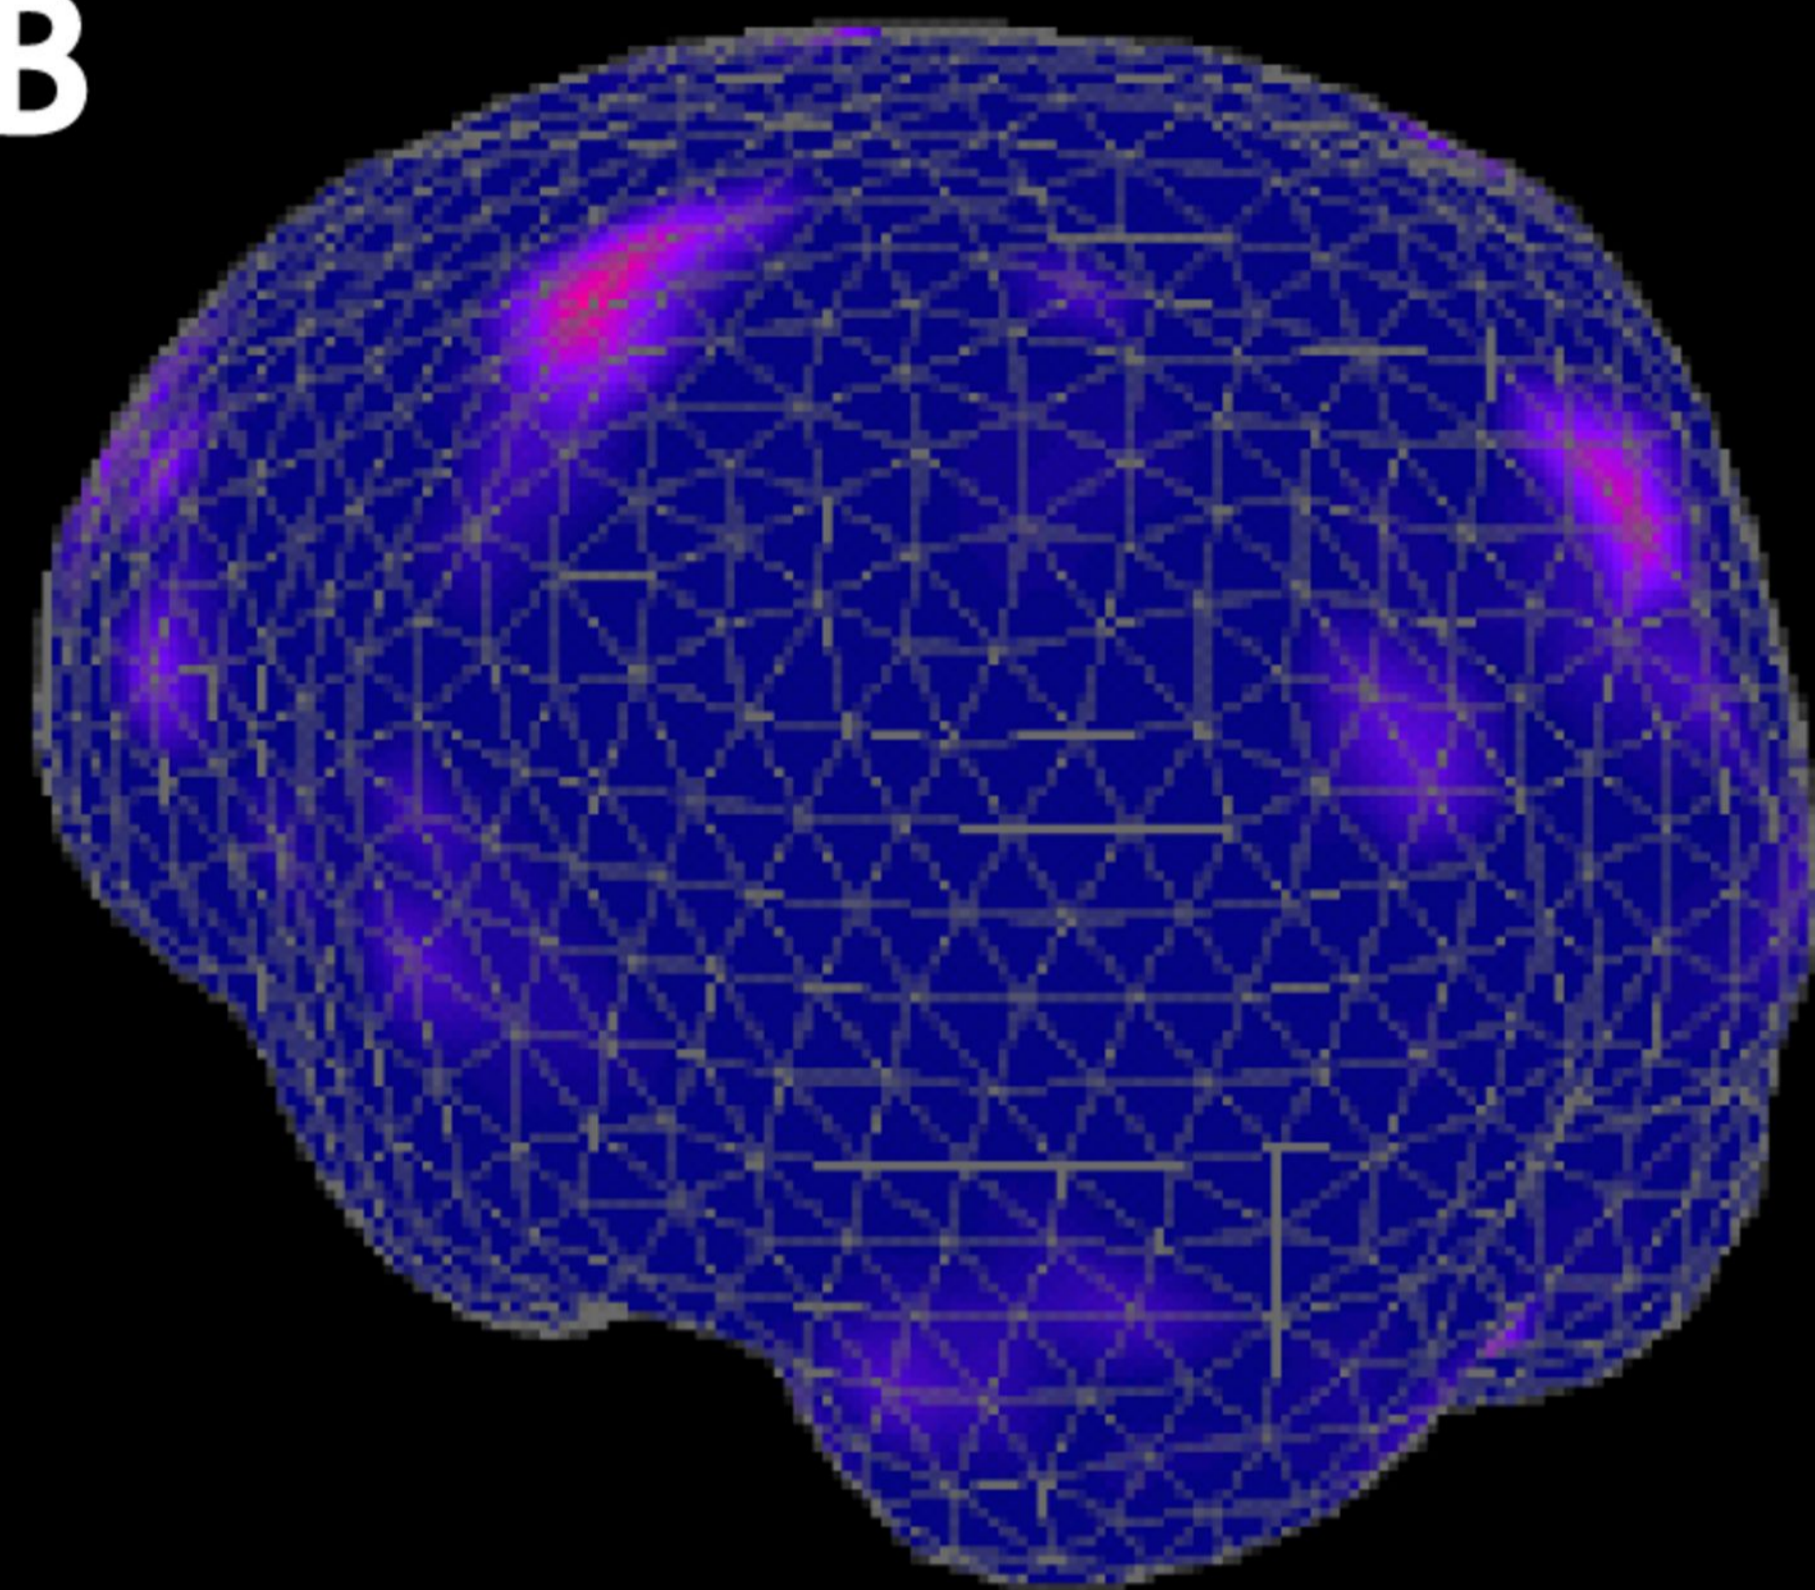

**C**

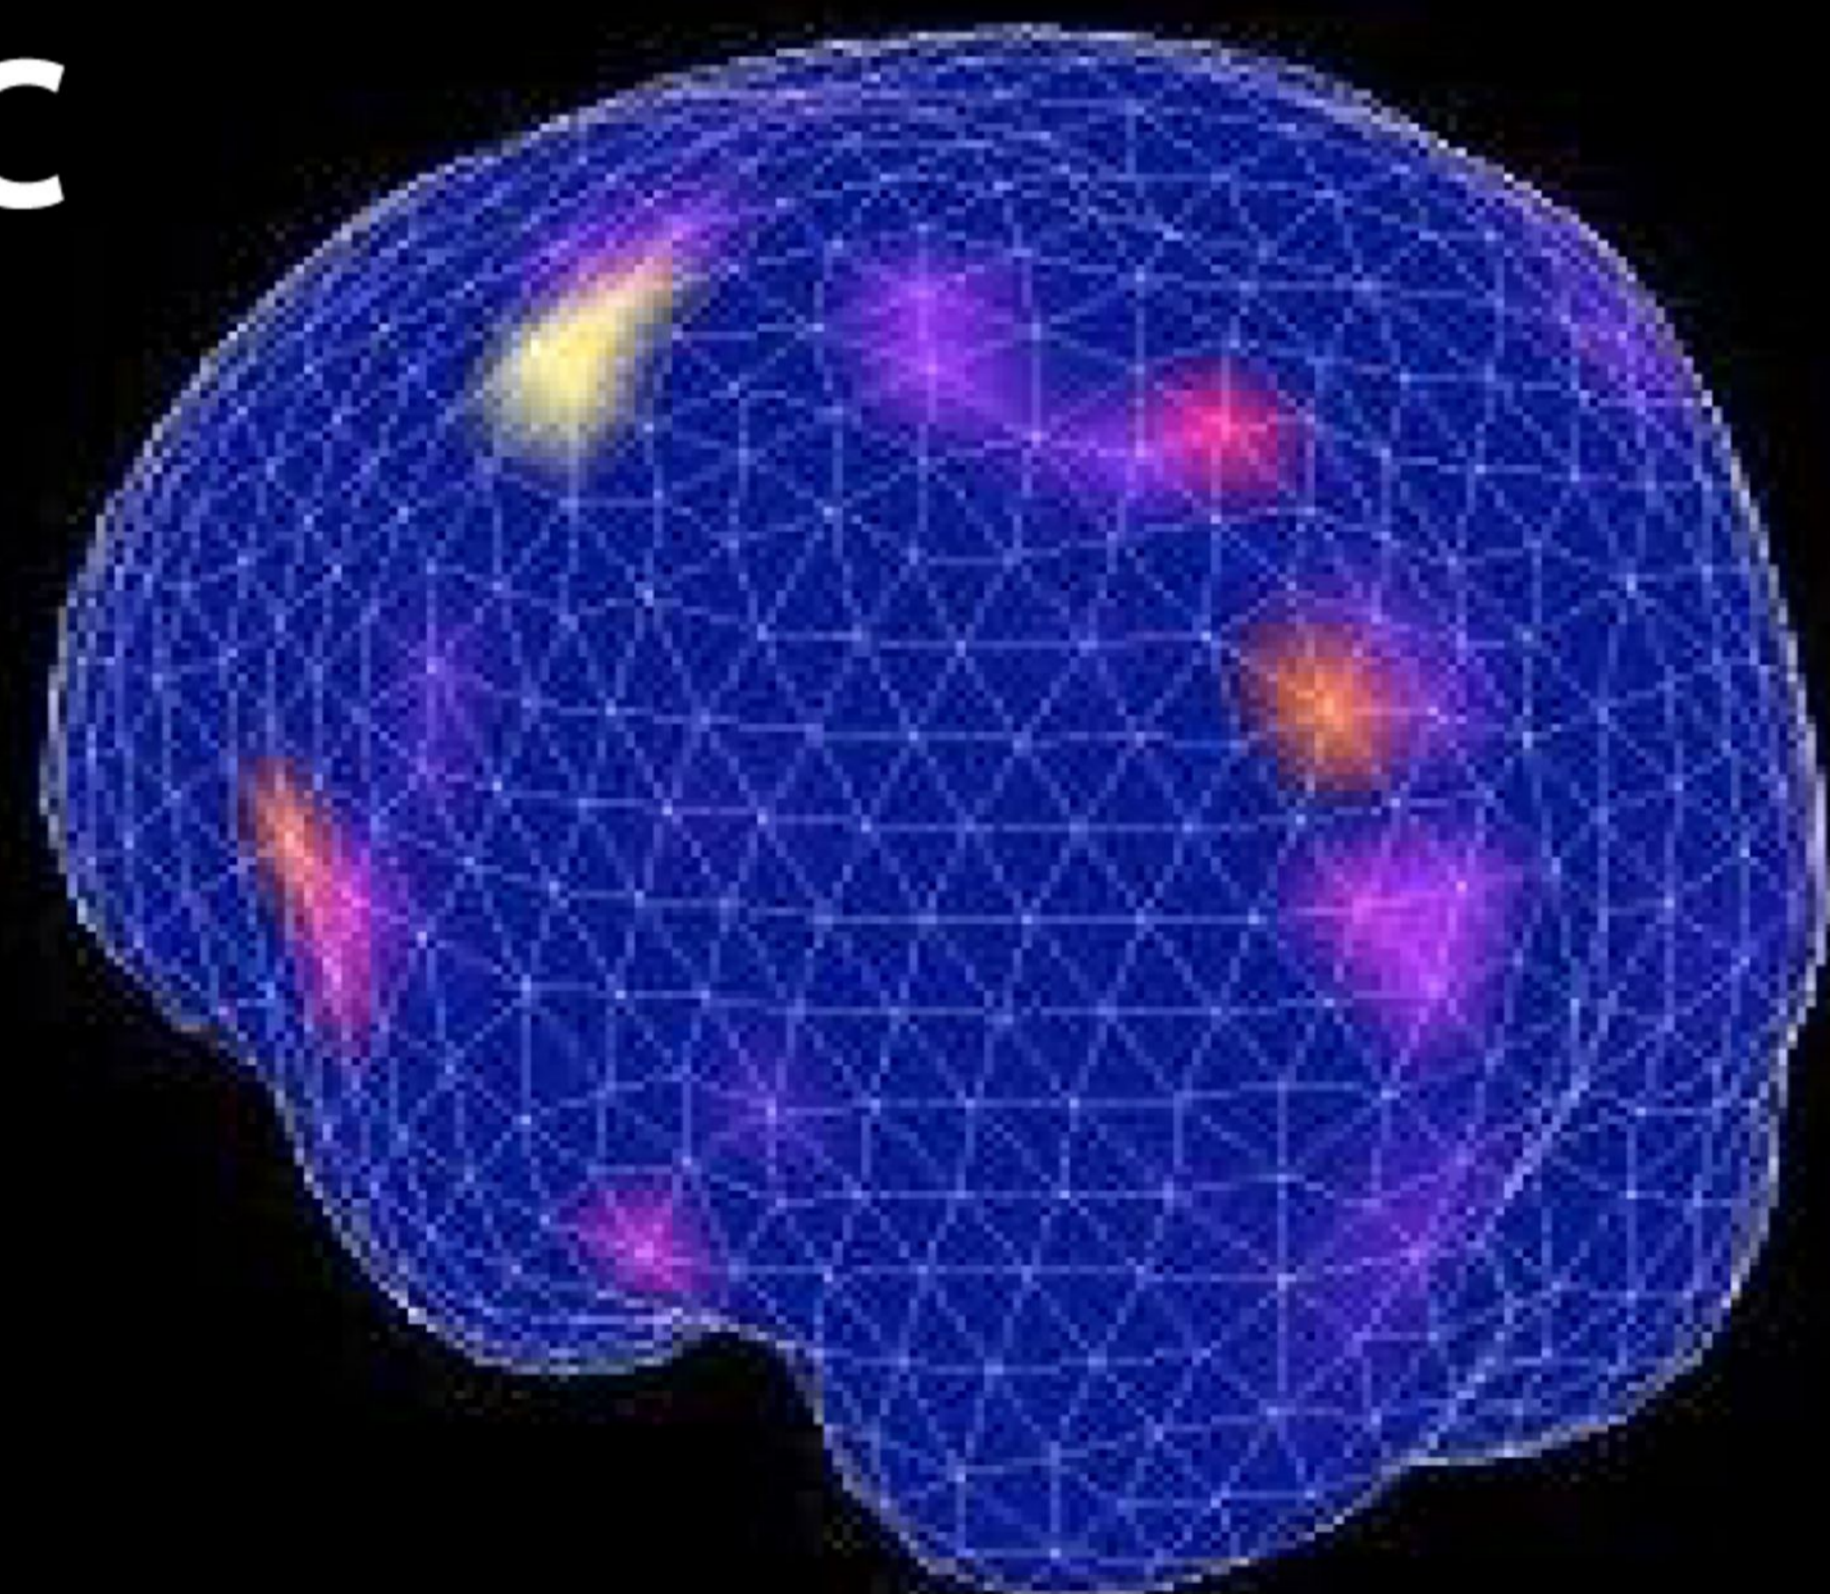

**30**

**20**

**10**

**0**

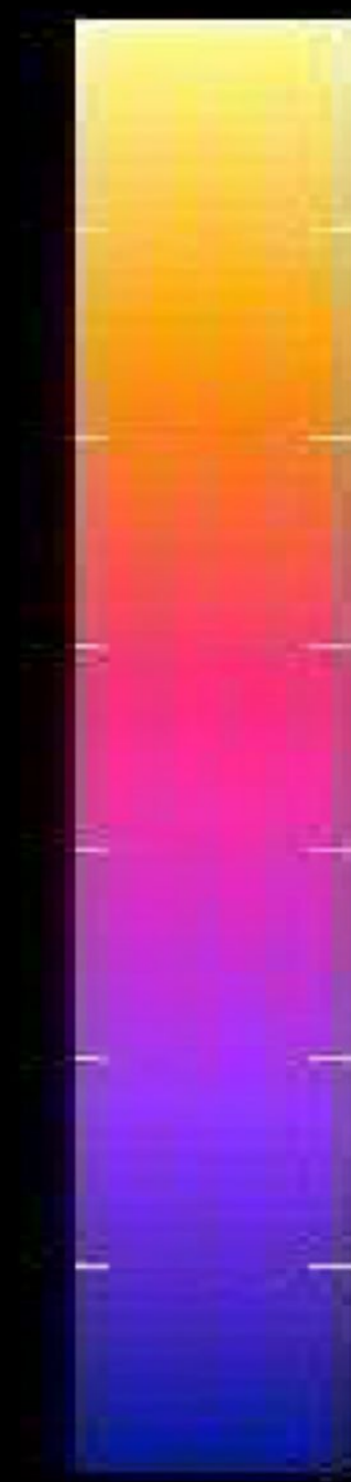

**D**

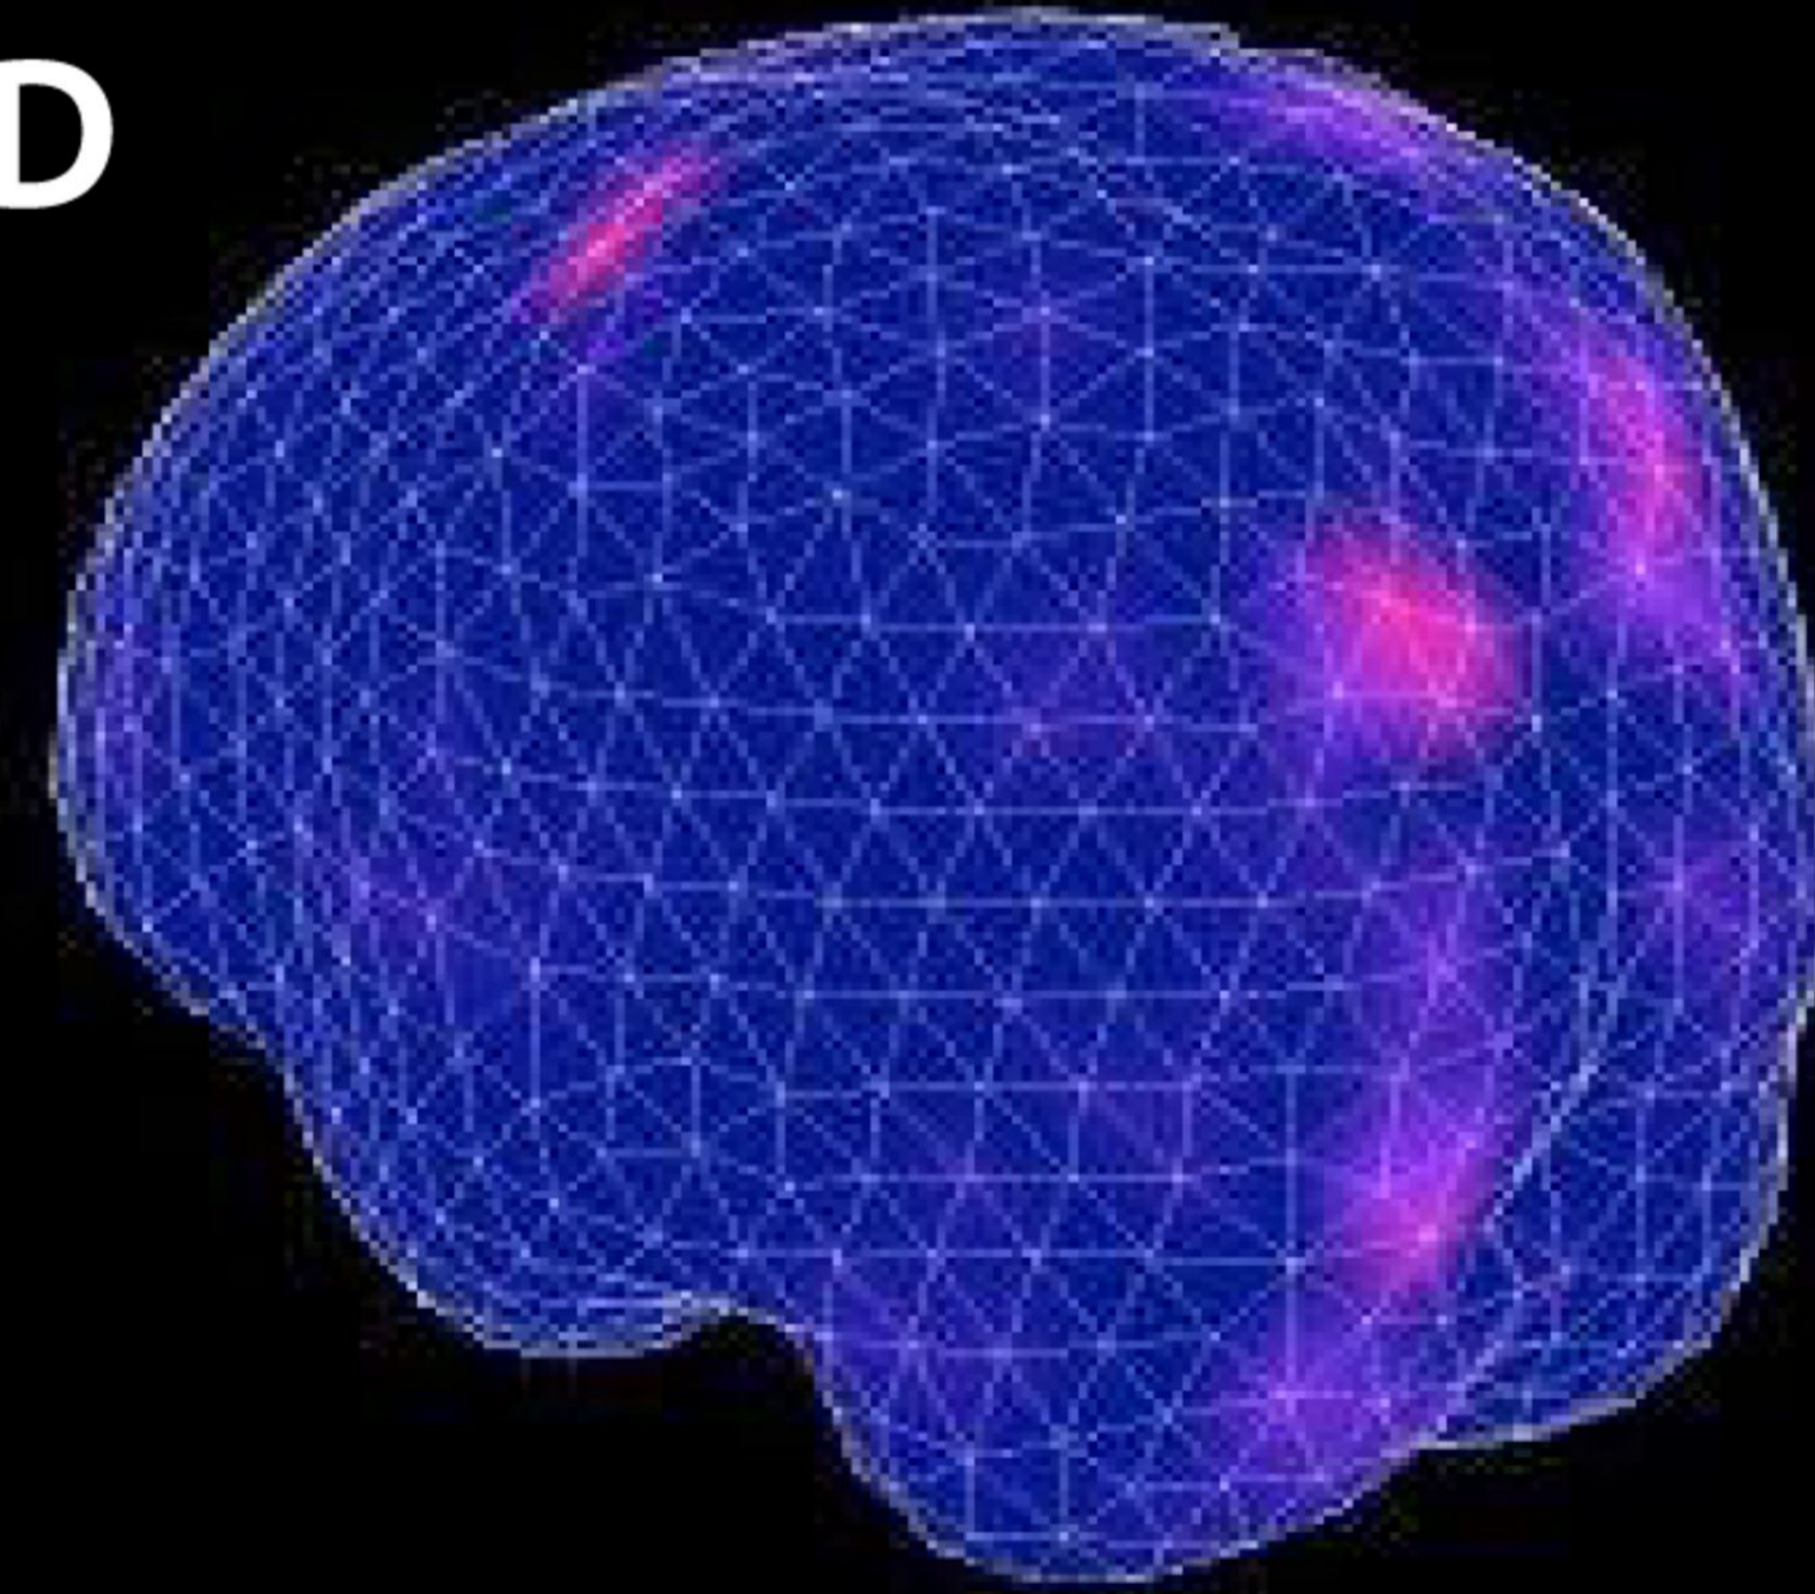

Supplement: supp_00239.2010_figS3.pdf [file supp_00239.2010_figS3.pdf]

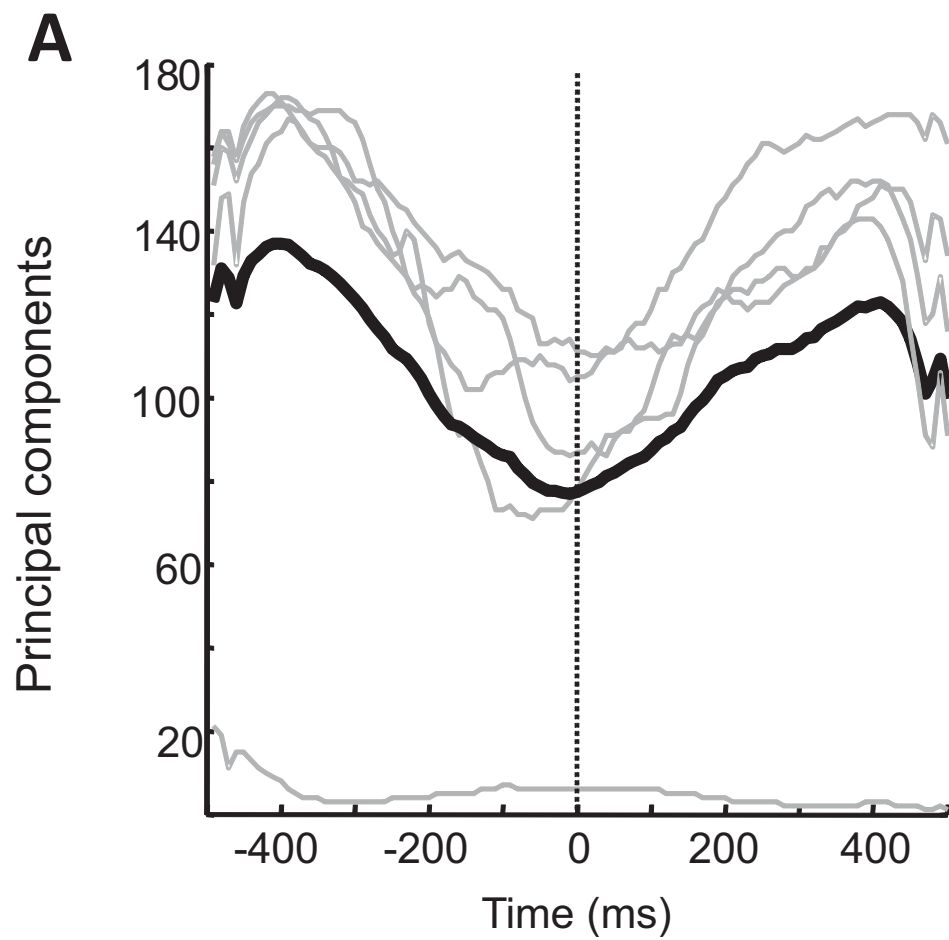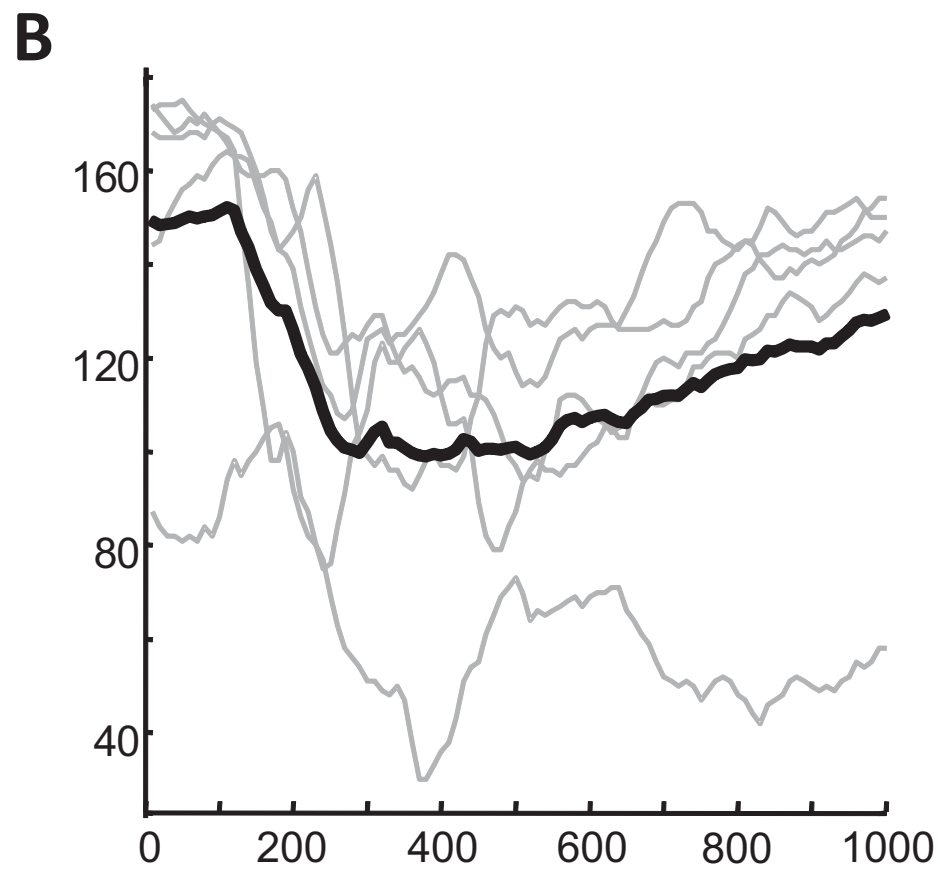

Supplement: supp_00239.2010_figS4.pdf [file supp_00239.2010_figS4.pdf]
